# Supplementary material for: Comparison of Very Short Answer Questions and Multiple Choice Questions in Medical Students: Reliability, Discrimination, Acceptability and Effect on Knowledge Retention
Source: bioRxiv or medRxiv preprint supplement (doi:10.1101/2022.07.13.22277583), 2022-07-15
Supplement: Supplementary file [file media-1.pdf]

**Comparison of Very Short Answer Questions and Multiple Choice Questions in Medical Students: Reliability, Discrimination, Acceptability and Effect on Knowledge Retention**

*Supplemental materials*

Roemer J. Janse\*, Elise V. van Wijk\*, Bastian N. Ruijter, Jos H.T. Rohling, Jolein van der Kraan, Stijn Crobach, Mario de Jonge, Arnout Jan de Beaufort, Friedo W. Dekker, Alexandra M.J. Langers.

\*These authors contributed equally to this work.

**SUPPLEMENTAL TABLES..... 2**

**Supplemental table 1.** Retention of knowledge of students tested with VSAQs compared to students of historical cohorts tested with MCQs. Numbers represent average percent-point score increase per measure moment among VSAQ group compared to MCQ group. .... 2

**Supplemental table 2.** Positive and negative cueing per person in MCQ*first* and VSAQ*first*. .... 2

**Supplemental table 3.** Positive and negative cueing per question in MCQ*first* and VSAQ*first*. .... 2

**Supplemental table 4.** Distribution of the answers given to the 5-point Likert scale evaluation questions halfway of the formative exam after MCQs (MCQ*first*) or VSAQs (VSAQ*first*). .... 3

**Supplemental table 5.** Distribution of the answers given to the 5-point Likert scale evaluation questions at the end of the formative exam. .... 3

**Supplemental table 6.** Median (IQR) scores of the 5-point Likert scale evaluation questions in the formative exam. EQ1-4 halfway of the exam after the MCQs (MCQ*first*) or VSAQs (VSAQ*first*); EQ5-EQ9 at the end of the exam after both MCQs and VSAQs..... 4

**Supplemental table 7.** Mean scores of the 5-point Likert scale evaluation questions after the summative exam..... 5

**Supplemental table 8.** Mean scores of the 5-point Likert scale questions on constructive alignment after the summative exam (1: strongly disagree, 2: disagree, 3: neutral, 4: agree, 5: strongly agree). .... 5

## Supplemental tables

**Supplemental table 1.** Retention of knowledge of students tested with VSAQs compared to students of historical cohorts tested with MCQs. Numbers represent average percent-point score increase per measure moment among VSAQ group compared to MCQ group.

|                   | Diseases of the Abdomen | Regulation and Metabolism |
|-------------------|-------------------------|---------------------------|
| 2 month retention | -1.1 (-3.3, 1.1)        | 3.1 (2.0, 4.3)            |
| 5 month retention | -2.5 (-4.2, -0.8)       | 3.8 (2.8, 4.8)            |

**Supplemental table 2.** Positive and negative cueing per person in MCQfirst and VSAQfirst.

|                                  | Regulation and Metabolism |                     | Diseases of the Abdomen |                    |
|----------------------------------|---------------------------|---------------------|-------------------------|--------------------|
|                                  | MCQfirst (n = 104)        | VSAQfirst (n = 112) | MCQfirst (n = 90)       | VSAQfirst (n = 69) |
| Positive cueing, median (IQR), % | 4.0 (4.0 - 8.0)           | 20.0 (16.0 - 28.0)  | 8.3 (4.2 - 16.7)        | 20.8 (12.5 - 29.2) |
| Negative cueing, median (IQR), % | 8.0 (4.0 - 12.0)          | 4.0 (0.0 - 4.0)     | 0.0 (0.0 - 4.2)         | 4.2 (0.0 - 4.2)    |

**Supplemental table 3.** Positive and negative cueing per question in MCQfirst and VSAQfirst.

|                                                        | Regulation & Metabolism |                     | Diseases of the Abdomen |                    |
|--------------------------------------------------------|-------------------------|---------------------|-------------------------|--------------------|
|                                                        | MCQfirst (n = 104)      | VSAQfirst (n = 112) | MCQfirst (n = 90)       | VSAQfirst (n = 69) |
| <b>Frequency of questions where cueing occurred, %</b> |                         |                     |                         |                    |
| Positive cueing                                        | 100                     | 100                 | 100                     | 100                |
| Negative cueing                                        | 92                      | 56                  | 79                      | 79                 |
| <b>Average frequency of cueing per question, %</b>     |                         |                     |                         |                    |
| Positive cueing, median (IQR)                          | 4.8 (2.9 - 9.6)         | 14.3 (7.1 - 33.9)   | 15.9 (11.8 - 20.3)      | 22.7 (10.9 - 28.5) |
| Positive cueing, max                                   | 26.9                    | 62.5                | 32.9                    | 43.8               |
| Negative cueing, median (IQR)                          | 3.8 (1.9 - 12.5)        | 0.9 (0.0 - 1.8)     | 1.8 (1.2 - 3.5)         | 3.1 (1.6 - 5.1)    |
| Negative cueing, max                                   | 38.5                    | 16.1                | 7.1                     | 10.9               |

**Supplemental table 4.** Distribution of the answers given to the 5-point Likert scale evaluation questions halfway of the formative exam after MCQs (MCQfirst) or VSAQs (VSAQfirst).

|                   | Regulation and Metabolism |     |     |                     |     |     | Diseases of the Abdomen |     |     |                    |     |     |
|-------------------|---------------------------|-----|-----|---------------------|-----|-----|-------------------------|-----|-----|--------------------|-----|-----|
|                   | MCQfirst (n = 104)        |     |     | VSAQfirst (n = 112) |     |     | MCQfirst (n = 85)       |     |     | VSAQfirst (n = 64) |     |     |
|                   | EQ1                       | EQ2 | EQ3 | EQ1                 | EQ2 | EQ3 | EQ1                     | EQ2 | EQ3 | EQ1                | EQ2 | EQ3 |
| Strongly disagree | 1%                        | 12% | 0%  | 2%                  | 12% | 2%  | 2%                      | 0%  | 0%  | 0%                 | 15% | 2%  |
| Disagree          | 10%                       | 46% | 10% | 15%                 | 45% | 4%  | 5%                      | 38% | 10% | 5%                 | 61% | 7%  |
| Neutral           | 32%                       | 39% | 13% | 28%                 | 39% | 8%  | 19%                     | 58% | 36% | 15%                | 25% | 10% |
| Agree             | 51%                       | 2%  | 54% | 52%                 | 2%  | 51% | 60%                     | 4%  | 47% | 74%                | 0%  | 46% |
| Strongly agree    | 7%                        | 0%  | 23% | 4%                  | 2%  | 35% | 14%                     | 0%  | 7%  | 7%                 | 0%  | 36% |

EQ1: *The questions are a good representation of how I would be expected to answer questions in clinical practice.*

EQ2: *I found the questions easy.*

EQ3: *I was often unsure whether my answer would be correct.*

**Supplemental table 5.** Distribution of the answers given to the 5-point Likert scale evaluation questions at the end of the formative exam.

|                   | Regulation and Metabolism (n = 216) |     |     |     |     | Diseases of the Abdomen (n = 146) |     |     |     |     |
|-------------------|-------------------------------------|-----|-----|-----|-----|-----------------------------------|-----|-----|-----|-----|
|                   | EQ5                                 | EQ6 | EQ7 | EQ8 | EQ9 | EQ5                               | EQ6 | EQ7 | EQ8 | EQ9 |
| Strongly disagree | 59%                                 | 9%  | 8%  | 9%  | 24% | 63%                               | 4%  | 9%  | 4%  | 12% |
| Disagree          | 31%                                 | 21% | 22% | 24% | 44% | 29%                               | 13% | 21% | 19% | 36% |
| Neutral           | 7%                                  | 36% | 19% | 42% | 26% | 3%                                | 23% | 24% | 41% | 37% |
| Agree             | 2%                                  | 31% | 41% | 25% | 6%  | 4%                                | 56% | 37% | 34% | 14% |
| Strongly Agree    | 0%                                  | 3%  | 10% | 1%  | 0%  | 0%                                | 4%  | 9%  | 2%  | 1%  |

EQ5: *VSAQs are easier than MCQs.*

EQ6: *VSAQs are more in line with daily clinical practice than MCQs.*

EQ7: *I prepare differently for an assessment with VSAQs than for an assessment with MCQs.*

EQ8: *VSAQs would be a better preparation for clinical practice than MCQs.*

EQ9: *Through the use of VSAQs, the test is better aligned with this course, than a test using MCQs.*

**Supplemental table 6.** Median (IQR) scores of the 5-point Likert scale evaluation questions in the formative exam. EQ1-4 halfway of the exam after the MCQs (MCQfirst) or VSAQs (VSAQfirst); EQ5-EQ9 at the end of the exam after both MCQs and VSAQs.

|     | Regulation and Metabolism |                        | Diseases of the Abdomen |                       |
|-----|---------------------------|------------------------|-------------------------|-----------------------|
|     | MCQfirst<br>(n = 104)     | VSAQfirst<br>(n = 112) | MCQfirst<br>(n = 85)    | VSAQfirst<br>(n = 64) |
| EQ1 | 4 (3-4)                   | 4 (3-4)                | 4 (3-4)                 | 4 (4-4)               |
| EQ2 | 2 (2-3)                   | 2 (2-3)                | 3 (2-3)                 | 2 (2-2)               |
| EQ3 | 4 (4-4)                   | 4 (4-5)                | 4 (3-4)                 | 4 (4-5)               |
| EQ4 | 6 (5-6)                   | 6 (6-7)                | 5 (4-6)                 | 6 (5-6)               |
| EQ5 |                           | 1 (1-2)                |                         | 1 (1-2)               |
| EQ6 |                           | 3 (2-4)                |                         | 4 (3-4)               |
| EQ7 |                           | 4 (2-4)                |                         | 3 (2-4)               |
| EQ8 |                           | 3 (2-4)                |                         | 3 (2-4)               |
| EQ9 |                           | 2 (2-3)                |                         | 2 (2-3)               |

EQ1: *The questions are a good representation of how I would be expected to answer questions in clinical practice.*

EQ2: *I found the questions easy.*

EQ3: *I was often unsure whether my answer would be correct.*

EQ4: *If I had to give an estimate of the grade I would have achieved based on these questions, my estimate would be <grade>.*

EQ5: *VSAQs are easier than MCQs.*

EQ6: *VSAQs are more in line with daily clinical practice than MCQs.*

EQ7: *I prepare differently for an assessment with VSAQs than for an assessment with MCQs.*

EQ8: *VSAQs would be a better preparation for clinical practice than MCQs.*

EQ9: *Through the use of VSAQs, the test is better aligned with this course, than a test using MCQs.*

**Supplemental table 7.** Mean scores of the 5-point Likert scale evaluation questions after the summative exam.

|                   | Regulation and Metabolism |              | Diseases of the Abdomen |             |
|-------------------|---------------------------|--------------|-------------------------|-------------|
|                   | Q1 (n = 147)              | Q2 (n = 148) | Q1 (n = 85)             | Q2 (n = 85) |
| Strongly disagree | 13%                       | 53%          | 26%                     | 18%         |
| Disagree          | 26%                       | 30%          | 27%                     | 33%         |
| Neutral           | 17%                       | 12%          | 6%                      | 19%         |
| Agree             | 35%                       | 5%           | 38%                     | 26%         |
| Strongly Agree    | 10%                       | 0%           | 4%                      | 5%          |
| Median (IQR)      | 2 (3-4)                   | 1 (1-2)      | 1 (2-4)                 | 2 (2-4)     |

Q1: *Because I knew that I would be tested by VSAQs, I studied in another way than I normally would;*

Q2: *Through the use of VSAQs, the test was a better representation of what I learned in this course, than a test using MCQs.*

**Supplemental table 8.** Mean scores of the 5-point Likert scale questions on constructive alignment after the summative exam (1: strongly disagree, 2: disagree, 3: neutral, 4: agree, 5: strongly agree).

|         | Regulation and Metabolism |           |     |           | Diseases of the Abdomen |           |     |           |
|---------|---------------------------|-----------|-----|-----------|-------------------------|-----------|-----|-----------|
|         | Q1                        |           | Q2  |           | Q1                      |           | Q2  |           |
|         | N                         | Mean (SD) | N   | Mean (SD) | N                       | Mean (SD) | N   | Mean (SD) |
| '16/'17 | NA                        | NA        | 197 | 3.6 (0.9) | NA                      | NA        | 170 | 3.6 (0.9) |
| '17/'18 | 50                        | 3.3 (1.1) | 50  | 3.2 (1.1) | 66                      | 3.6 (1.0) | 66  | 3.5 (0.7) |
| '18/'19 | 63                        | 3.1 (1.2) | 62  | 2.9 (1.2) | 62                      | 2.2 (1.1) | 62  | 2.2 (1.1) |
| '20/'21 | 149                       | 2.2 (1.1) | 149 | 2.2 (1.1) | 127                     | 2.9 (1.1) | 127 | 3.1 (1.1) |

Q1: *The assessment as a whole (form and content) is appropriate for what you should have mastered at the end of the course.*

Q2 = *The (online) test formats matched what I have learned; NA = not available.*
